# Supplementary material for: Small area synthetic estimates of smoking prevalence during pregnancy in England
Source: PubMed Central journal article supplement (PMC4674906; doi:10.1186/s12963-015-0067-8), 2015-12-09

Additional file 2: Normal probability plots of PCT-level residuals from the IFS models

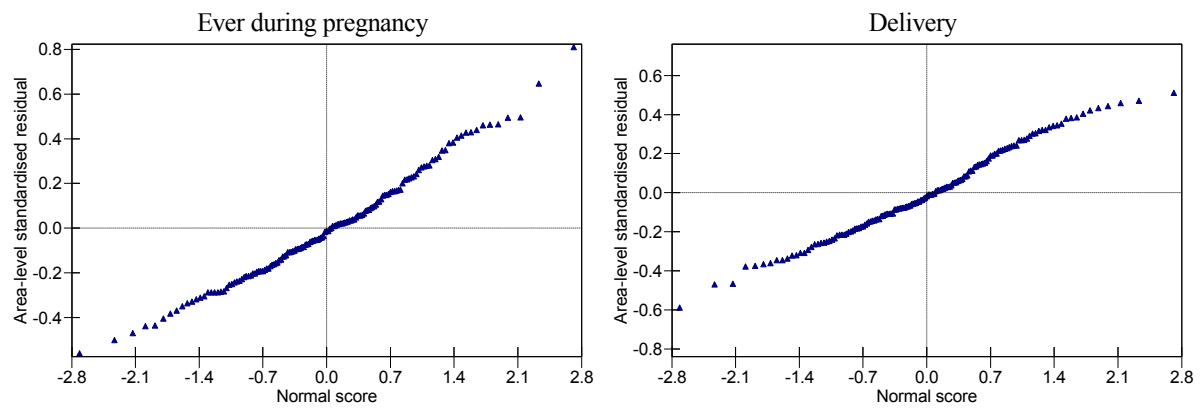

Supplement: 12963_2015_67_MOESM2_ESM.pdf [file 12963_2015_67_MOESM2_ESM.pdf]
