# Supplementary material for: Small area synthetic estimates of smoking prevalence during pregnancy in England
Source: PubMed Central journal article supplement (PMC4674906; doi:10.1186/s12963-015-0067-8), 2015-12-09

## Additional file 6: Comparison of IFS-based estimates and model-based synthetic estimates

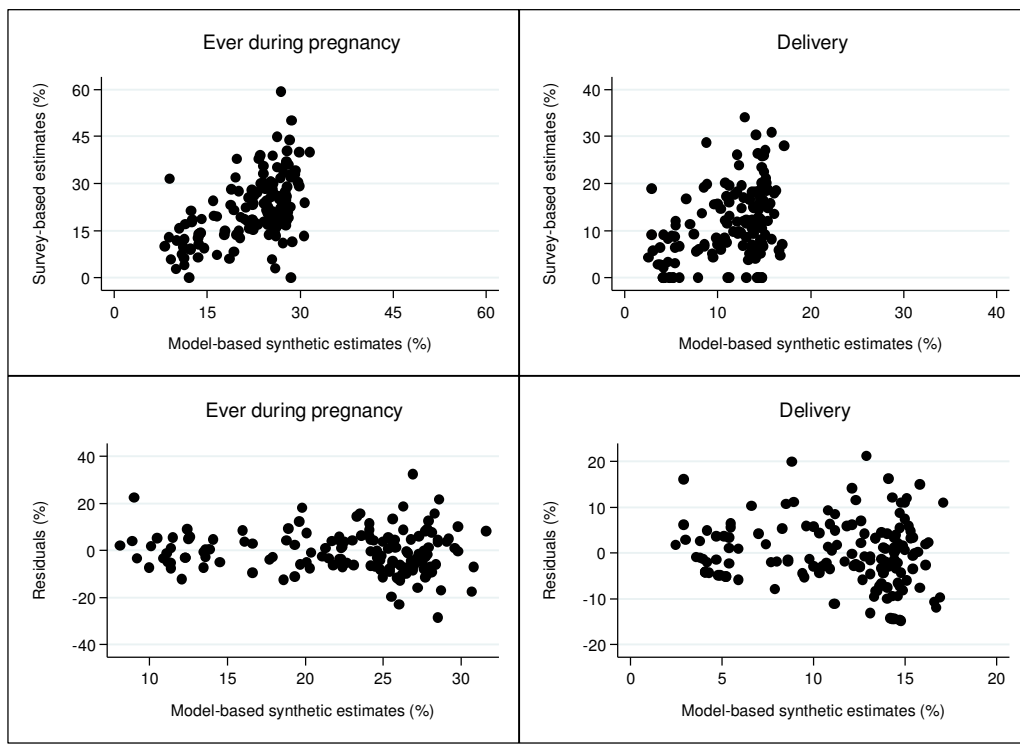

Supplement: 12963_2015_67_MOESM6_ESM.pdf [file 12963_2015_67_MOESM6_ESM.pdf]
