# Supplementary material for: Small area synthetic estimates of smoking prevalence during pregnancy in England
Source: Springer Nature journal article supplement (doi:10.1186/s12963-015-0067-8), 2015-12-01

Additional file 3: Geographical variation in PCT-level residuals from the IFS models

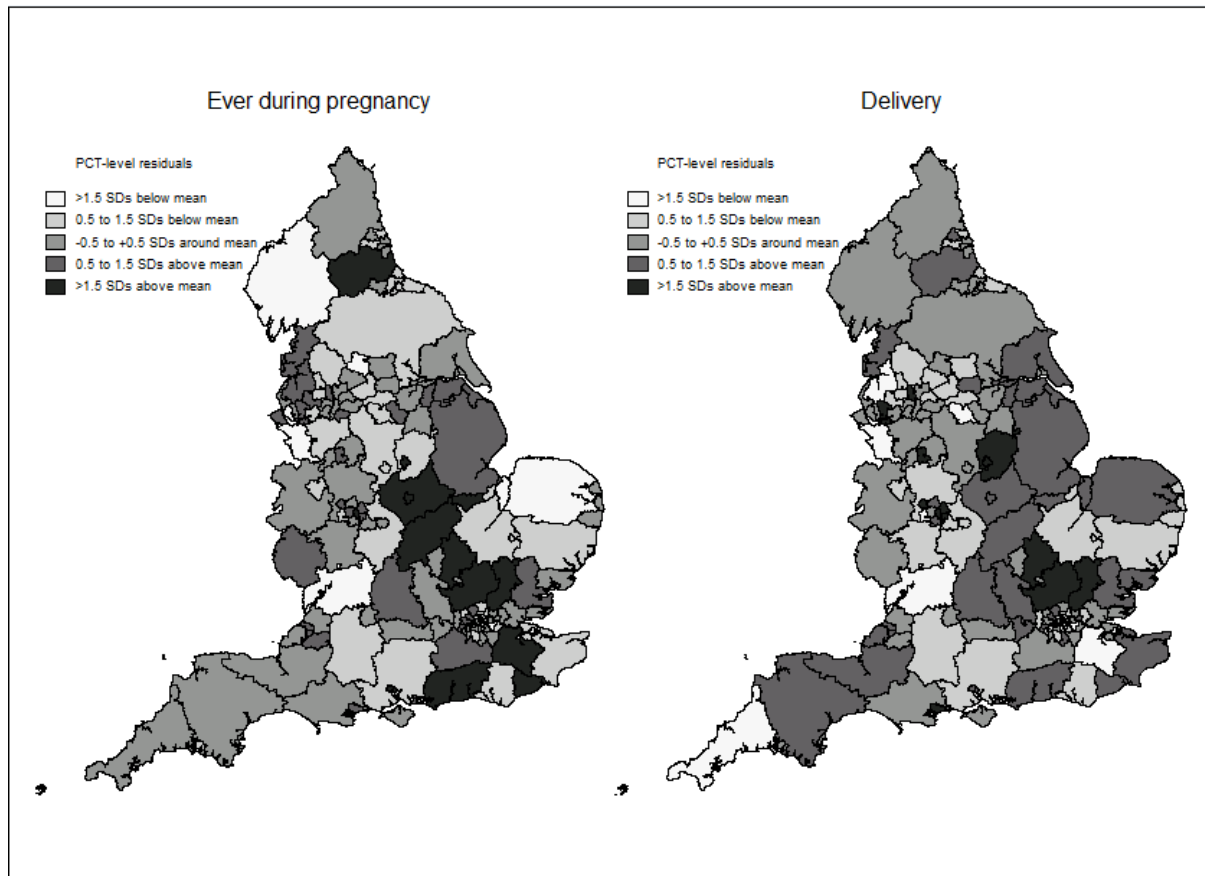

Supplement: MOESM3 [file 9766252]
